# Supplementary material for: Comparative Effects of Alpha- and Gamma-Tocopherol on Mitochondrial Functions in Alzheimer’s Disease In Vitro Model
Source: PubMed Central journal article supplement (PMC7265356; doi:10.1038/s41598-020-65570-4), 2020-06-02

## **Comparative Effects of Alpha- and Gamma-Tocopherol on Mitochondrial Functions in Alzheimer's Disease In Vitro Model**

**Aslina Pahrudin Arrozi<sup>1</sup>, Siti Nur Syazwani Shukri<sup>1</sup>, Wan Zurinah Wan Ngah<sup>1</sup>, Yasmin Anum Mohd Yusof<sup>1</sup>, Mohd Hanafi Ahmad Damanhuri<sup>1</sup>, Faizul Jaafar<sup>1</sup>, Suzana Makpol<sup>1,\*</sup>**

<sup>1</sup>Department of Biochemistry, Level 17, Preclinical Building, Universiti Kebangsaan Malaysia Medical Centre, Jalan Yaacob Latif, Bandar Tun Razak, Cheras, 56000 Kuala Lumpur, Malaysia

### Figure Legends

1: Untreated control

2: 5  $\mu$ M ATF

3: 100  $\mu$ M ATF

4: 5  $\mu$ M GTF

5: 80  $\mu$ M GTF

 Representative images

### Full Image of Western blotting

Optimization of Pro-caspase-3 using different sample

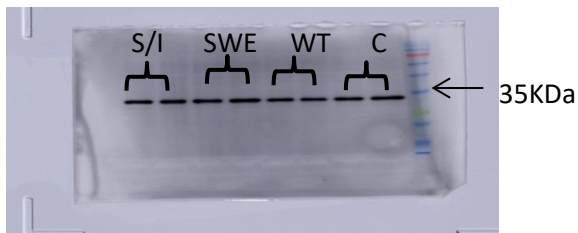

Optimization of  $\beta$ -actin using different sample

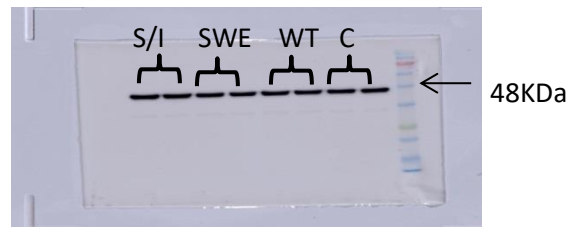

**Pro-caspase-3** (pro-caspase 3 and  $\beta$ -actin were detected on the same membrane but one after another)

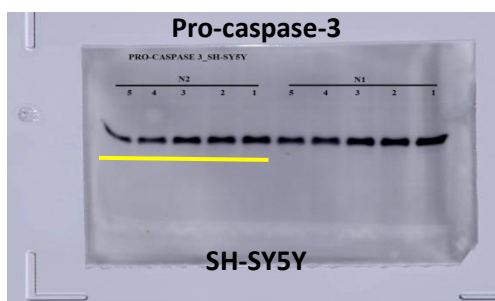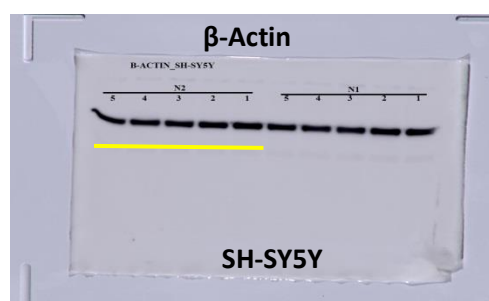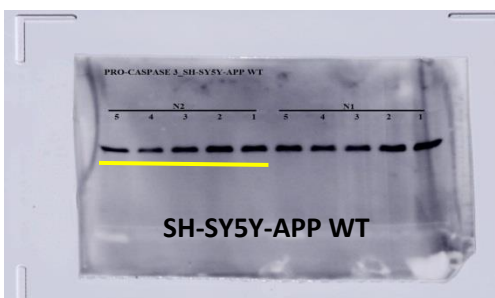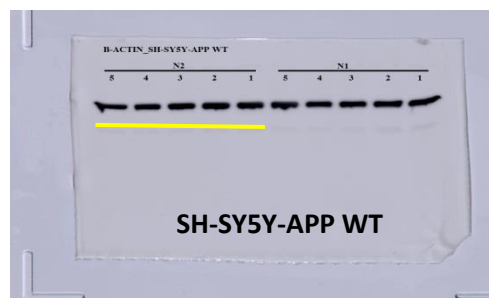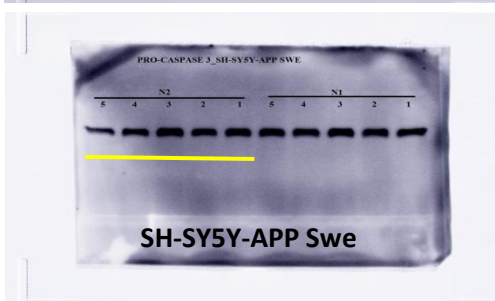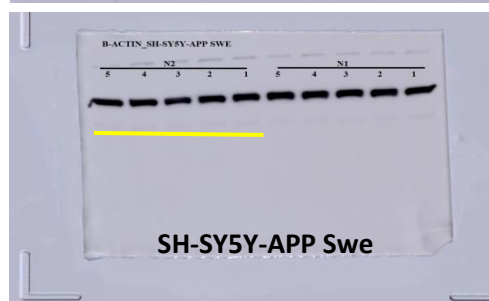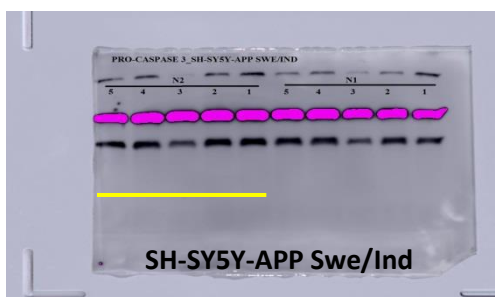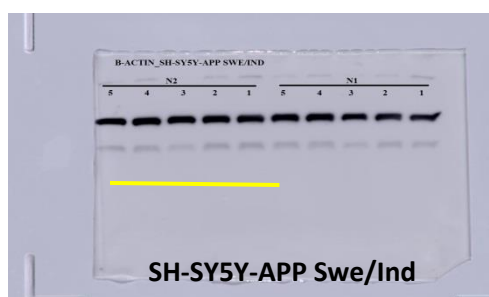

Simultaneous detection of pro-caspase-3 and  $\beta$ -actin, resulted in overexposure of  $\beta$ -actin, as shown by the purple band. Because of this reason, pro-caspase-3 and  $\beta$ -actin were detected at different time and one after another. This apply to all other proteins.

**Bcl-2** (Bcl-2 and  $\beta$ -actin were detected on the same membrane but one after another)

Optimization of BAX and Bcl-2 using different sample

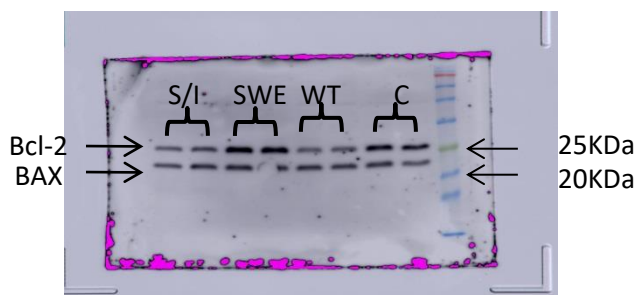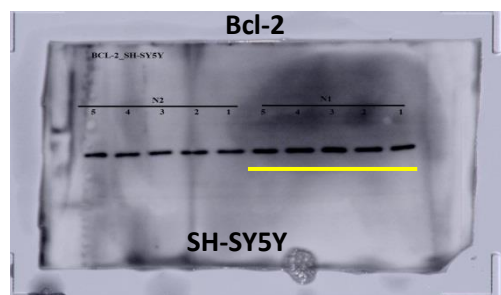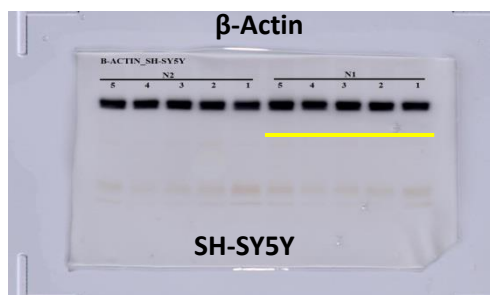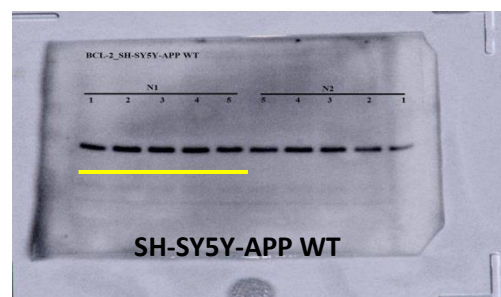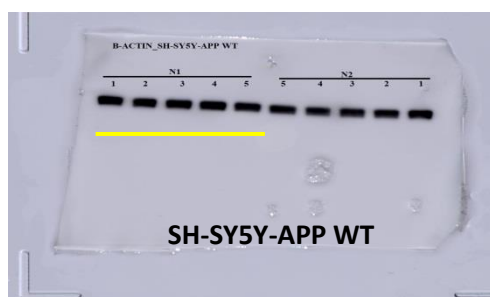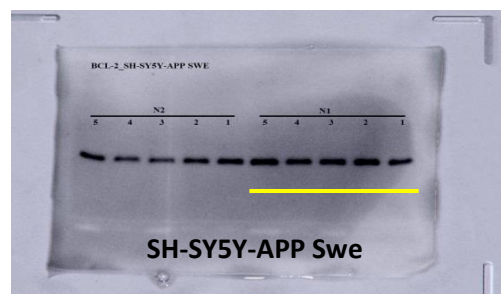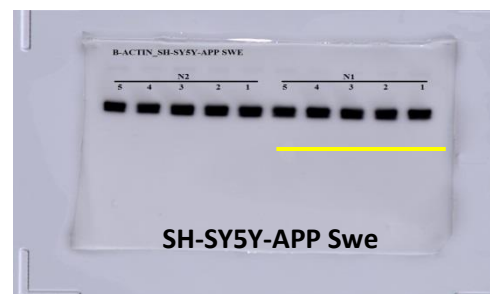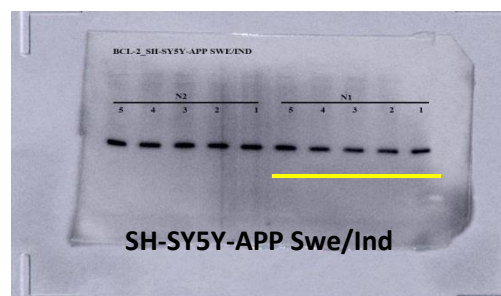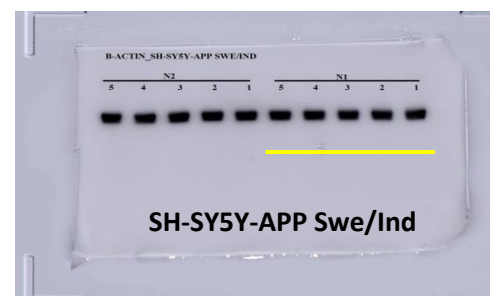

**BAX** (BAX and  $\beta$ -actin were detected on the same membrane but one after another)

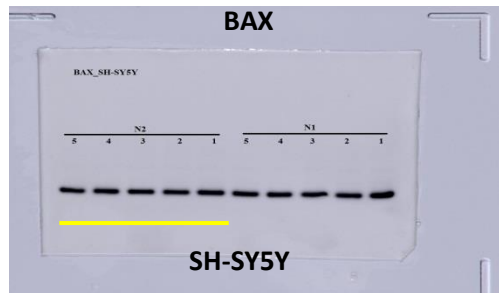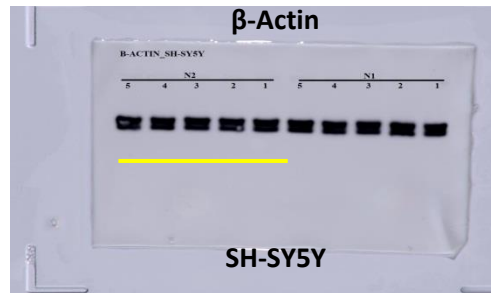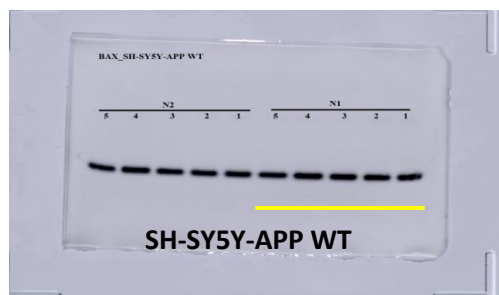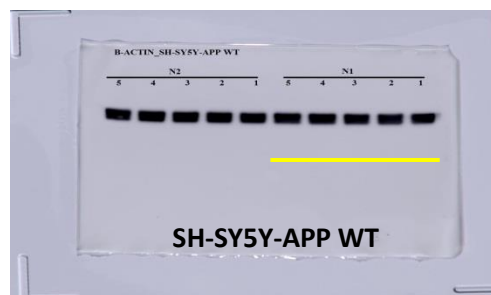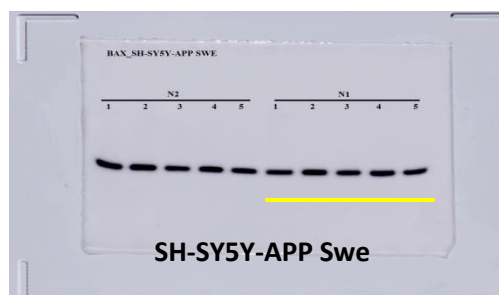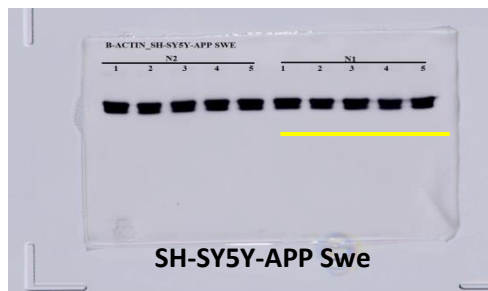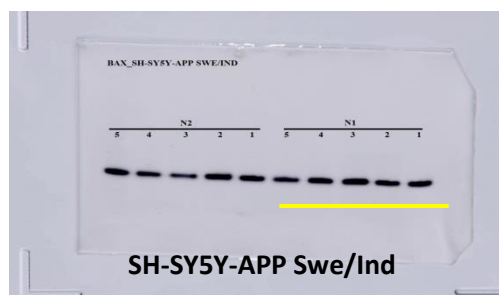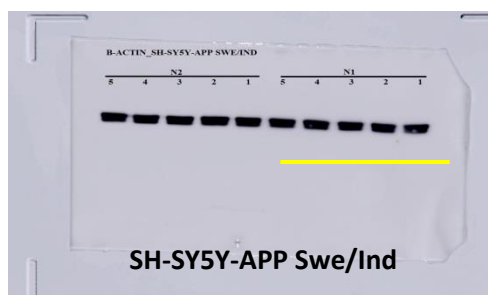

## Cytochrome C

The membrane was cut into half for the detection of  $\beta$ -actin (upper part) and cytochrome c (lower part)

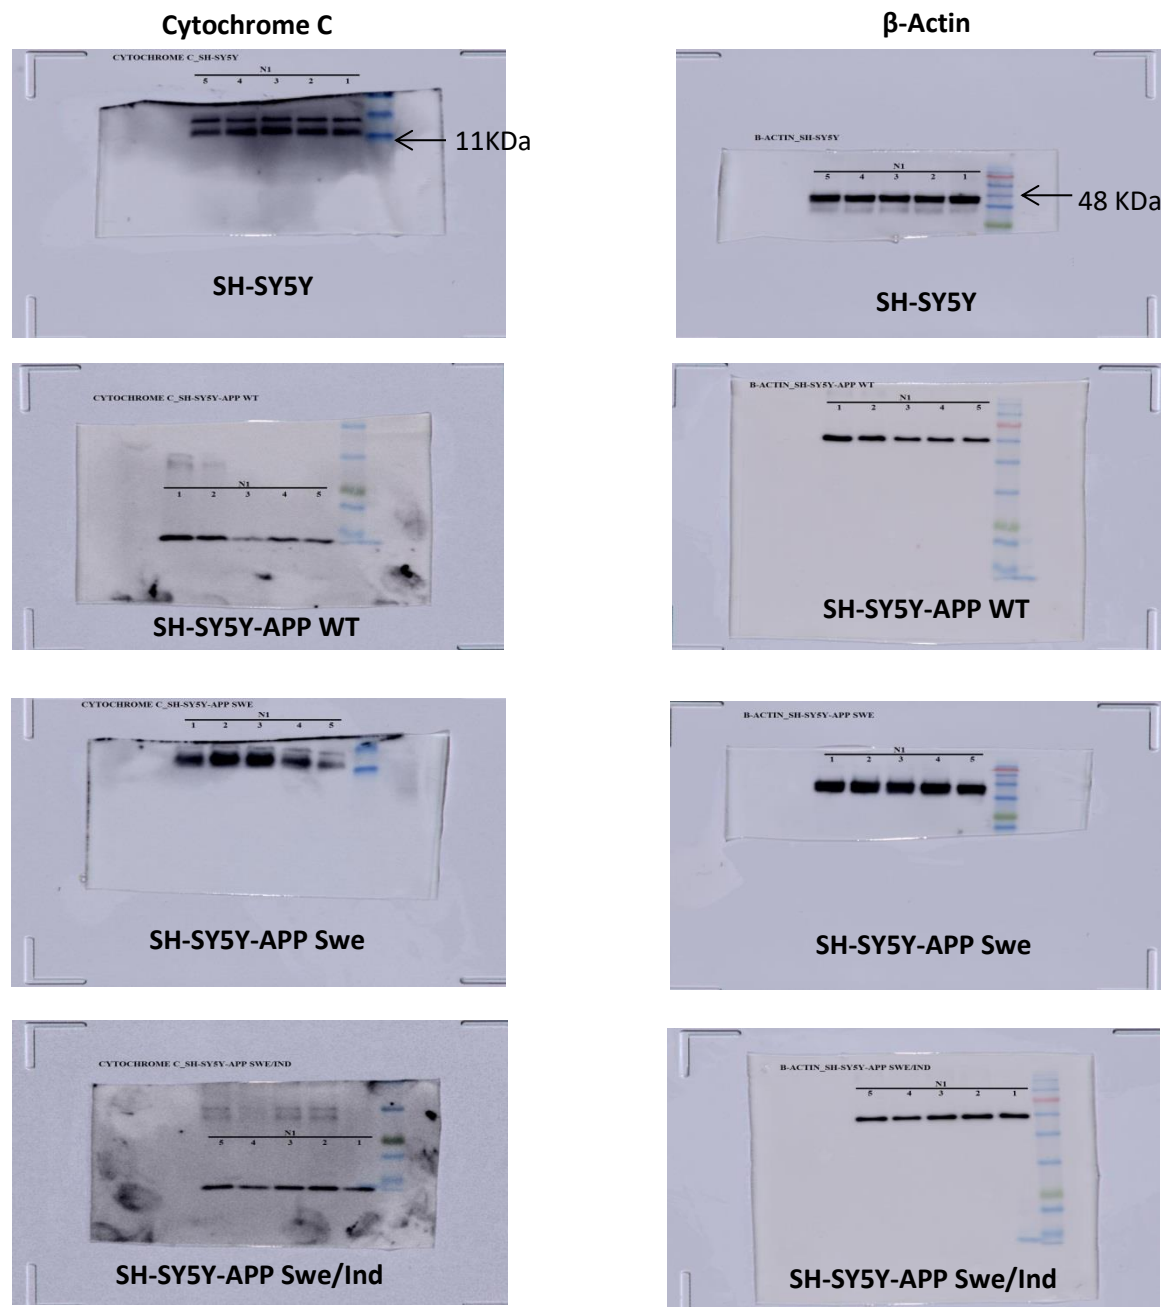

### CYPD

The molecular weight of CYPD and  $\beta$ -actin was almost the same (CYPD: 40kDa,  $\beta$ -actin: 42kDa), therefore all samples were run on 2 gels, 1 gel to detect CYPD and the other to detect  $\beta$ -actin.

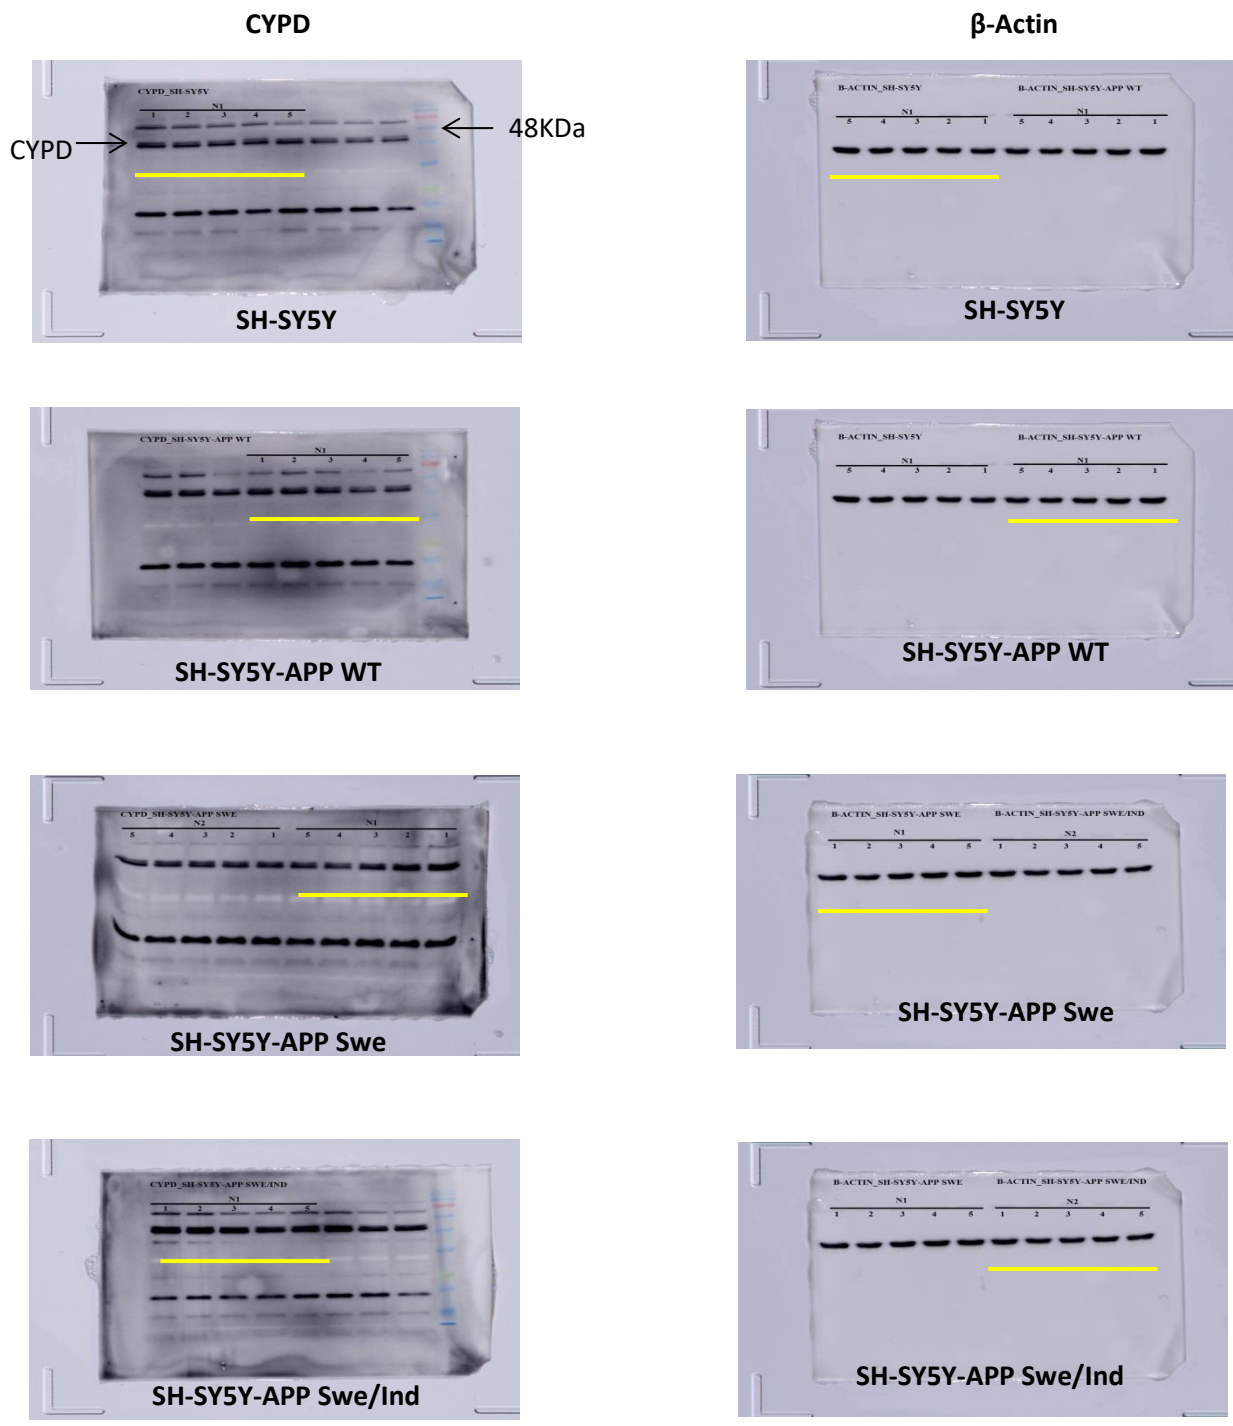

Supplement: 41598_2020_65570_MOESM1_ESM.pdf [file 41598_2020_65570_MOESM1_ESM.pdf]
